# Supplementary material for: Combining segments 9 and 10 in DNA and recombinant protein vaccines conferred superior protection against tilapia lake virus in hybrid red tilapia (oreochromis sp.) compared to single segment vaccines
Source: PubMed Central journal article supplement (PMC9359061; doi:10.3389/fimmu.2022.935480), 2022-07-25
Supplement: Table_1.pdf [file Table_1.pdf]

## Supplementary Information:

**Supplementary Table 1.** Primers used in this study.

| TiLV segment | GenBank accession number | Primer name    | Sequence (5' - 3')                                |
|--------------|--------------------------|----------------|---------------------------------------------------|
| 1            | KX631921                 | SpecificTiLV-F | CAGGGAGAAAGCCCACTGAG                              |
|              |                          | SpecificTiLV-R | CTCCAATTGACCCCATGCCT                              |
| 1            | KX631921                 | Tis1-F         | GGATCCATGTGGGCATTTCAAGAAGGAGT ( <i>Bam</i> HI)    |
|              |                          | Tis1-R         | AAGCTTTTAGCACCCAGCGGTGGGCT ( <i>Hid</i> III)      |
| 2            | KX631922                 | Tis2-F         | GAGCTCATGAGTCAGTTTGGGAAAT ( <i>Sac</i> I)         |
|              |                          | Tis2-R         | GCGGCCGCCTACTGATTTAGATCCATATT ( <i>Not</i> I)     |
| 3            | KX631923                 | Tis3-F         | GGATCCATGGACTCGCGGTTTGCAC ( <i>Bam</i> HI)        |
|              |                          | Tis3-R         | AAGCTTTTATCTCGCAAATGGGTGTAAGTGC ( <i>Hid</i> III) |
| 4            | KX631924                 | Tis4-F         | GGATCCATGAAAATGGTGAGAACTACAAAG ( <i>Bam</i> HI)   |
|              |                          | Tis4-R         | CTCGAGCTATCTCCCAACAGCCCCTGC ( <i>Xho</i> I)       |
| 5            | KX631925                 | Tis5-F         | GCGGATTCATGTTTCTTATCTCAG ( <i>Bam</i> HI)         |
|              |                          | Tis5-R         | GGTCTAGATCAAGATAATGGAAGCAG ( <i>Xba</i> I)        |
| 6            | KX631927                 | Tis6-F         | GAATTCATGCATTTTATCTACAGGATTA ( <i>Eco</i> RI)     |
|              |                          | Tis6-R         | GGCTCAGATCACATGTATTTATTG ( <i>Xba</i> I)          |

Supplementary Table 1 (Continued)

| <b>TiLV<br/>segment</b> | <b>GenBank accession<br/>number</b> | <b>Primer<br/>name</b> | <b>Sequence (5'-3')</b>                             |
|-------------------------|-------------------------------------|------------------------|-----------------------------------------------------|
| 7                       | KX631927                            | Tis7-F                 | GGATCCATGTCCTACAAGATTGGTGAGCTTG ( <i>BamHI</i> )    |
|                         |                                     | Tis7-R                 | AAGCTTTTAGAGTTCAAACGTGATTCCTTTAGG ( <i>HidIII</i> ) |
| 8                       | KX631928                            | Tis8-F                 | GGTACCATGGCTCAAATCCCAACAC ( <i>KpnI</i> )           |
|                         |                                     | Tis8-R                 | GCGGCCGCTCATTTAAGCATTTACGG ( <i>NotI</i> )          |
| 9                       | KX631929                            | Tis9-F                 | GAATTCATGTTGGTGATGTCACGATGG ( <i>EcoRI</i> )        |
|                         |                                     | Tis9-R                 | GCGGCCGCTCATAAAGTTCTATCGCCAGCCATG ( <i>NotI</i> )   |
| 9                       | KX631929                            | TiLV-S9-F              | GGAAGCTTATGGTGATGTCACGATG ( <i>HidIII</i> )         |
|                         |                                     | TiLV-S9-R              | GGCTCGAGTCATAAAGTTCTATCGC ( <i>XhoI</i> )           |
| 10                      | KX631930                            | Tis10-F                | GGATCCATGAGTGTGGCAGATTATTTGTC ( <i>BamHI</i> )      |
|                         |                                     | Tis10-R                | AAGCTTCTAAGACTCCACGTCAAGAG ( <i>HidIII</i> )        |
| 10                      | KX631930                            | TiLV-S10-F             | GCGGATCCATGAGTGTGGCAGAT ( <i>BamHI</i> )            |
|                         |                                     | TiLV-S10-R             | GGTCTAGACTAAGACTGCACGTC ( <i>XbaI</i> )             |
