# Supplementary material for: Combining segments 9 and 10 in DNA and recombinant protein vaccines conferred superior protection against tilapia lake virus in hybrid red tilapia (oreochromis sp.) compared to single segment vaccines
Source: PubMed Central journal article supplement (PMC9359061; doi:10.3389/fimmu.2022.935480), 2022-07-25
Supplement: Table_3.pdf [file Table_3.pdf]

### Supplementary Information:

**Supplementary Table 3.** Secondary structure (H, alpha-helix; E, beta-sheet; C, coil), solvent accessibility (B, buried; M, medium expose; E, expose), linear and conformational B-cell epitope (E, epitope) prediction of Tis10 protein.

| Residue | Amino acid | Secondary structure | Solvent accessibility | Linear B-cell epitope | Conformational B-cell epitope |
|---------|------------|---------------------|-----------------------|-----------------------|-------------------------------|
| 1       | M          | C                   | E                     | -                     | -                             |
| 2       | S          | C                   | E                     | -                     | -                             |
| 3       | V          | H                   | E                     | -                     | -                             |
| 4       | A          | H                   | E                     | -                     | -                             |
| 5       | D          | H                   | E                     | -                     | -                             |
| 6       | Y          | H                   | E                     | -                     | -                             |
| 7       | L          | C                   | E                     | -                     | -                             |
| 8       | S          | C                   | E                     | -                     | -                             |
| 9       | S          | C                   | E                     | -                     | -                             |
| 10      | D          | C                   | E                     | -                     | -                             |
| 11      | S          | C                   | E                     | -                     | -                             |
| 12      | D          | C                   | E                     | -                     | -                             |
| 13      | S          | C                   | E                     | -                     | -                             |
| 14      | E          | H                   | E                     | -                     | -                             |
| 15      | A          | H                   | E                     | -                     | -                             |
| 16      | E          | H                   | E                     | -                     | -                             |
| 17      | S          | H                   | E                     | -                     | -                             |
| 18      | S          | C                   | E                     | -                     | -                             |
| 19      | G          | C                   | E                     | -                     | -                             |
| 20      | C          | C                   | E                     | -                     | -                             |
| 21      | L          | E                   | E                     | -                     | -                             |

**Supplementary Table 3 (Continued)**

| Residue | Amino acid | Secondary structure | Solvent accessibility | Linear B-cell epitope | Conformational B-cell epitope |
|---------|------------|---------------------|-----------------------|-----------------------|-------------------------------|
| 22      | V          | E                   | M                     | -                     | -                             |
| 23      | L          | E                   | B                     | -                     | -                             |
| 24      | R          | E                   | M                     | -                     | -                             |
| 25      | S          | H                   | B                     | -                     | -                             |
| 26      | R          | H                   | E                     | -                     | -                             |
| 27      | K          | H                   | E                     | -                     | -                             |
| 28      | I          | H                   | M                     | -                     | E                             |
| 29      | R          | H                   | E                     | E                     | E                             |
| 30      | K          | H                   | E                     | E                     | -                             |
| 31      | G          | H                   | E                     | E                     | E                             |
| 32      | K          | H                   | E                     | E                     | -                             |
| 33      | K          | H                   | E                     | E                     | -                             |
| 34      | A          | H                   | E                     | E                     | E                             |
| 35      | A          | H                   | E                     | E                     | E                             |
| 36      | S          | H                   | E                     | E                     | E                             |
| 37      | K          | H                   | E                     | E                     | E                             |
| 38      | K          | H                   | E                     | E                     | E                             |
| 39      | R          | H                   | E                     | E                     | -                             |
| 40      | S          | C                   | E                     | E                     | E                             |
| 41      | W          | C                   | B                     | E                     | -                             |
| 42      | K          | C                   | E                     | E                     | E                             |
| 43      | N          | C                   | E                     | E                     | E                             |
| 44      | E          | C                   | E                     | E                     | E                             |
| 45      | R          | C                   | E                     | E                     | -                             |
| 46      | Y          | C                   | E                     | E                     | -                             |

**Supplementary Table 3 (Continued)**

| Residue | Amino acid | Secondary structure | Solvent accessibility | Linear B-cell epitope | Conformational B-cell epitope |
|---------|------------|---------------------|-----------------------|-----------------------|-------------------------------|
| 47      | G          | C                   | E                     | E                     | -                             |
| 48      | A          | C                   | E                     | E                     | -                             |
| 49      | D          | C                   | E                     | E                     | -                             |
| 50      | E          | C                   | E                     | E                     | -                             |
| 51      | R          | C                   | E                     | E                     | E                             |
| 52      | G          | C                   | E                     | E                     | E                             |
| 53      | E          | C                   | E                     | E                     | E                             |
| 54      | D          | C                   | E                     | E                     | E                             |
| 55      | N          | C                   | E                     | E                     | -                             |
| 56      | I          | C                   | B                     | -                     | -                             |
| 57      | E          | C                   | E                     | -                     | -                             |
| 58      | W          | C                   | M                     | -                     | -                             |
| 59      | G          | C                   | E                     | -                     | -                             |
| 60      | D          | C                   | E                     | -                     | -                             |
| 61      | E          | C                   | E                     | -                     | -                             |
| 62      | V          | C                   | M                     | -                     | -                             |
| 63      | D          | C                   | E                     | -                     | -                             |
| 64      | L          | C                   | B                     | -                     | -                             |
| 65      | E          | C                   | E                     | -                     | -                             |
| 66      | M          | C                   | M                     | -                     | -                             |
| 67      | D          | C                   | E                     | -                     | -                             |
| 68      | D          | C                   | E                     | -                     | -                             |
| 69      | C          | C                   | M                     | -                     | -                             |
| 70      | D          | C                   | E                     | -                     | -                             |
| 71      | S          | C                   | E                     | -                     | -                             |
| 72      | A          | C                   | E                     | -                     | -                             |

**Supplementary Table 3 (Continued)**

| Residue | Amino acid | Secondary structure | Solvent accessibility | Linear B-cell epitope | Conformational B-cell epitope |
|---------|------------|---------------------|-----------------------|-----------------------|-------------------------------|
| 73      | I          | C                   | B                     | -                     | -                             |
| 74      | P          | C                   | E                     | -                     | -                             |
| 75      | E          | C                   | E                     | -                     | -                             |
| 76      | W          | C                   | B                     | -                     | -                             |
| 77      | A          | C                   | M                     | -                     | -                             |
| 78      | R          | C                   | E                     | -                     | -                             |
| 79      | V          | C                   | M                     | -                     | -                             |
| 80      | D          | C                   | E                     | -                     | -                             |
| 81      | F          | C                   | B                     | E                     | -                             |
| 82      | N          | C                   | E                     | E                     | -                             |
| 83      | P          | C                   | E                     | E                     | -                             |
| 84      | K          | C                   | E                     | E                     | E                             |
| 85      | N          | C                   | E                     | E                     | E                             |
| 86      | R          | C                   | E                     | E                     | -                             |
| 87      | R          | C                   | E                     | E                     | -                             |
| 88      | D          | C                   | E                     | E                     | E                             |
| 89      | R          | C                   | E                     | E                     | E                             |
| 90      | E          | C                   | E                     | E                     | -                             |
| 91      | D          | C                   | E                     | E                     | E                             |
| 92      | D          | C                   | E                     | E                     | E                             |
| 93      | G          | C                   | E                     | -                     | -                             |
| 94      | Q          | C                   | E                     | -                     | -                             |
| 95      | S          | C                   | E                     | -                     | -                             |
| 96      | D          | C                   | E                     | -                     | -                             |
| 97      | L          | H                   | E                     | -                     | -                             |
| 98      | S          | H                   | E                     | -                     | -                             |

**Supplementary Table 3** (Continued)

| Residue | Amino acid | Secondary structure | Solvent accessibility | Linear B-cell epitope | Conformational B-cell epitope |
|---------|------------|---------------------|-----------------------|-----------------------|-------------------------------|
| 99      | R          | H                   | E                     | -                     | -                             |
| 100     | F          | H                   | E                     | -                     | -                             |
| 101     | S          | H                   | E                     | -                     | -                             |
| 102     | E          | H                   | E                     | -                     | -                             |
| 103     | D          | H                   | E                     | -                     | -                             |
| 104     | F          | H                   | E                     | -                     | -                             |
| 105     | G          | C                   | E                     | E                     | E                             |
| 106     | K          | C                   | E                     | E                     | E                             |
| 107     | K          | C                   | E                     | E                     | E                             |
| 108     | S          | C                   | E                     | E                     | -                             |
| 109     | L          | C                   | E                     | E                     | -                             |
| 110     | D          | C                   | E                     | E                     | -                             |
| 111     | V          | C                   | E                     | E                     | -                             |
| 112     | Q          | C                   | E                     | E                     | -                             |
| 113     | S          | C                   | E                     | E                     | -                             |
